# Supplementary material for: Heterogeneous antiretroviral drug distribution and HIV/SHIV detection in the gut of three species
Source: PubMed Central journal article supplement (PMC8273920; doi:10.1126/scitranslmed.aap8758), 2019-07-03
Supplement: NIHMS1718903-supplement-Supplemetary_material.pdf [file NIHMS1718903-supplement-Supplemetary_material.pdf]

## Supplementary Materials for

### **Heterogeneous antiretroviral drug distribution and HIV/SHIV detection in the gut of three species**

Corbin G. Thompson, Elias P. Rosen, Heather M. A. Prince, Nicole White, Craig Sykes, Gabriela de la Cruz, Michelle Mathews, Claire Deleage, Jacob D. Estes, Paige Charlins, Leila R. Mulder, Martina Kovarova, Lourdes Adamson, Shifali Arora, Evan S. Dellon, Anne F. Peery, Nicholas J. Shaheen, Cynthia Gay, David C. Muddiman, Ramesh Akkina, J. Victor Garcia, Paul Luciw, Angela D. M. Kashuba\*

\*Corresponding author. Email: [akashuba@unc.edu](mailto:akashuba@unc.edu)

Published 3 July 2019, *Sci. Transl. Med.* **11**, eaap8758 (2019)  
DOI: 10.1126/scitranslmed.aap8758

#### **The PDF file includes:**

Fig. S1. Effect of gelatin embedding on antiretroviral drug distribution.  
Fig. S2. Resolution matching of microscopy and MSI data.  
Fig. S3. Image colocalization workflow.  
Table S1. Subject demographics.  
Table S2. Human plasma and tissue antiretroviral drug concentrations.  
Table S3. Proportion of CD3<sup>+</sup> T cells exposed to at least one antiretroviral drug.  
Table S4. Dosing of animals.

#### **Other Supplementary Material for this manuscript includes the following:**

(available at [stm.sciencemag.org/cgi/content/full/11/499/eaap8758/DC1](http://stm.sciencemag.org/cgi/content/full/11/499/eaap8758/DC1))

Data file S1 (Microsoft Excel format). Individual-level data for tables.

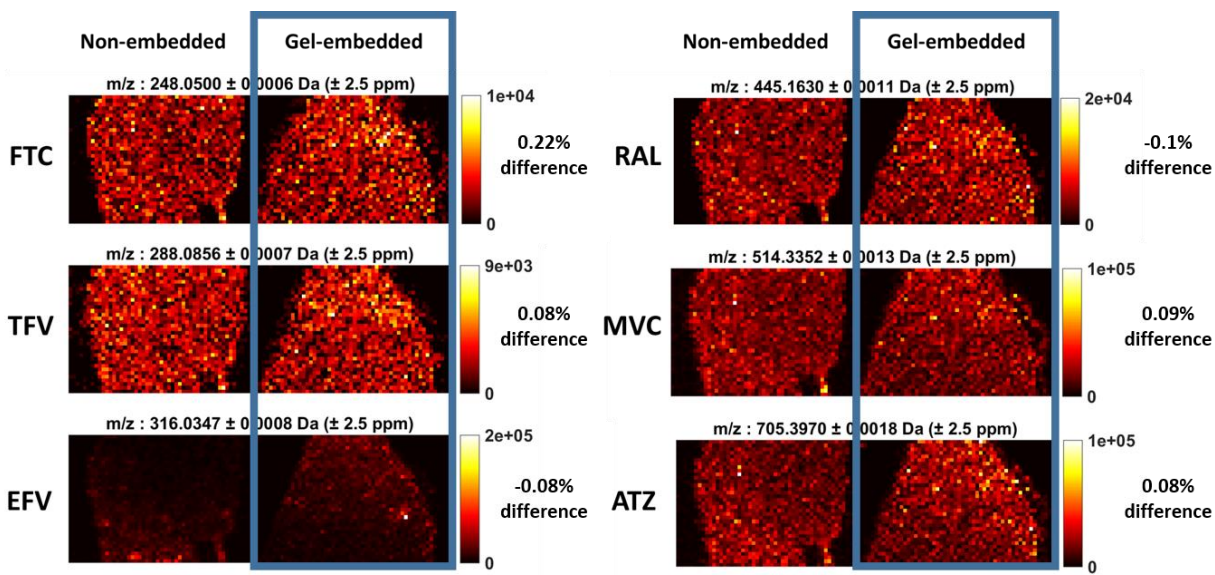

**Fig. S1. Effect of gelatin embedding on antiretroviral drug distribution.** Raw MSI images are shown for the six ARVs evaluated in this study from ARV-incubated tissue that was divided in two and analyzed with and without gelatin embedding. Signal abundance for each ARV is shown in the scale bar to the right of each image.

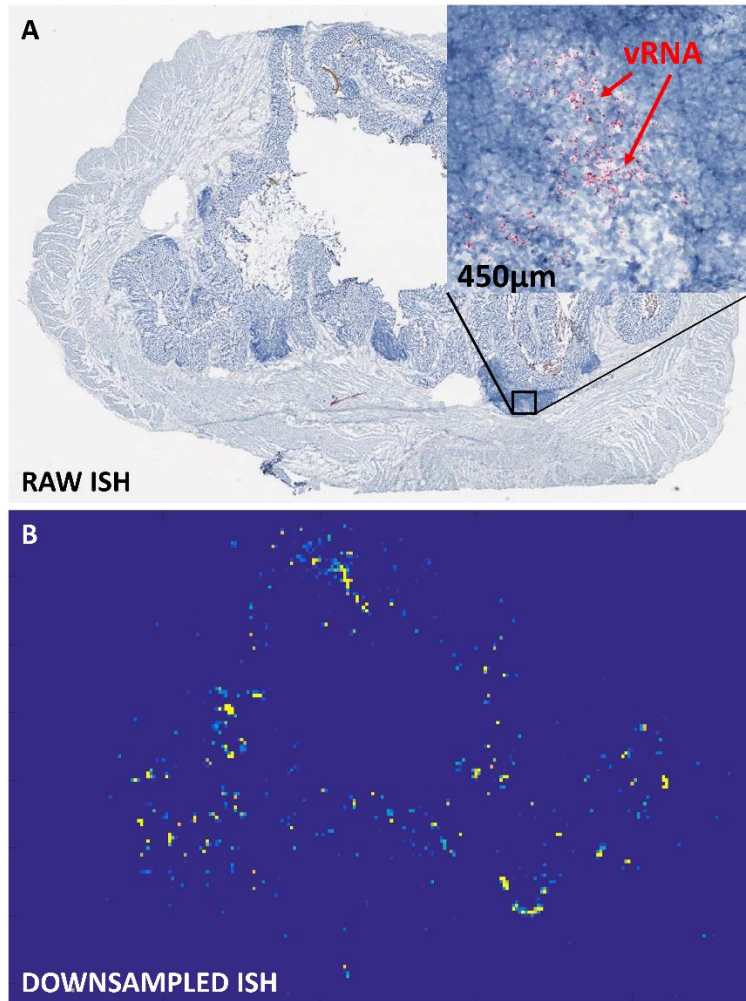

**Fig. S2. Resolution matching of microscopy and MSI data.** Raw in situ hybridization (ISH) image of a non-human primate rectum (A). Positive vRNA staining is shown in red in the insert of A. Raw ISH images were thresholded based on positive staining and down-sampled to match the resolution of MSI data (B), with brighter colors (yellow) representing positive signal.

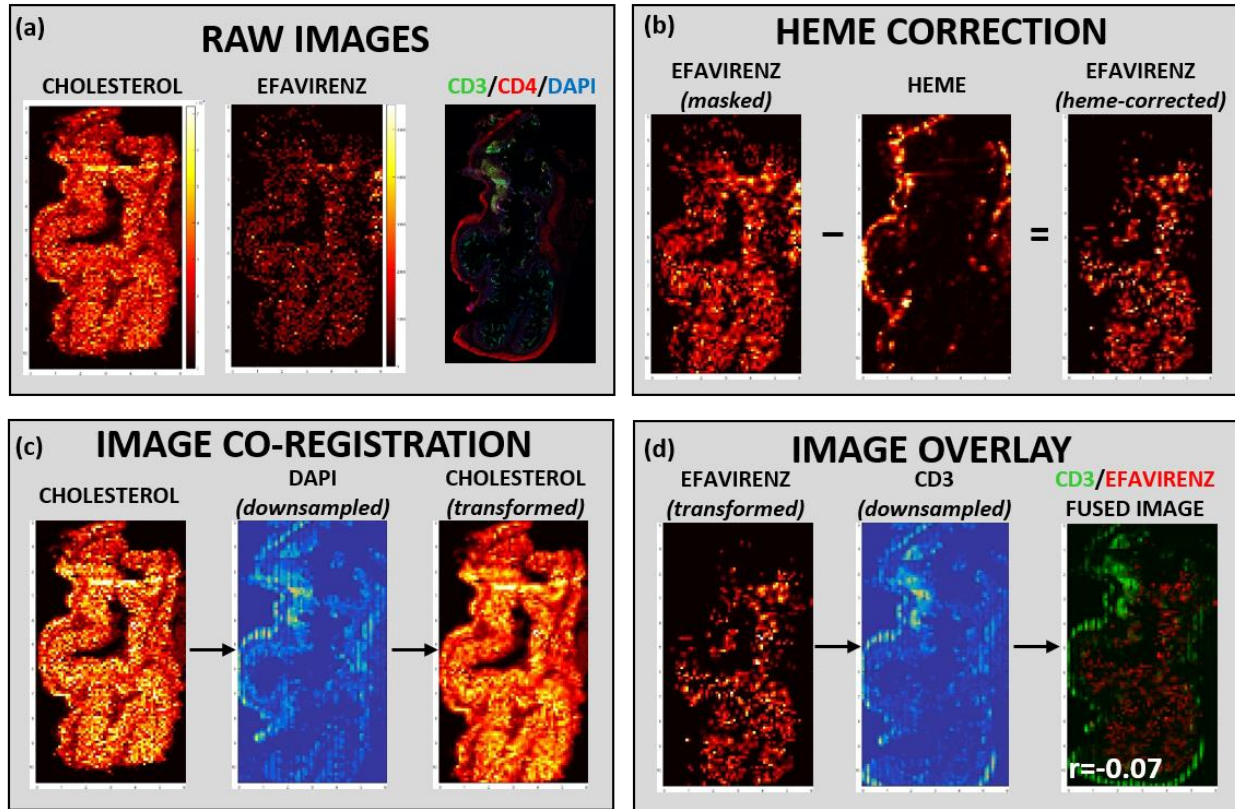

**Fig. S3. Image colocalization workflow.** (a) Representative raw IR-MALDESI (cholesterol and efavirenz) and IF (CD3, CD4, DAPI) images. (b) Total ARV signal is masked based on corresponding heme distribution. (c) Co-registration of cholesterol and DAPI image leading to transformed cholesterol. (d) Overlay of ARV and variable of interest (CD3 in figure) to form fused image of ARV (red) and CD3 (green), with correlation coefficient shown.

**Table S1. Subject demographics.**

|                                        | <b>EFV<br/>(n=1)</b> | <b>RAL<br/>(n=1)</b> | <b>ATZ<br/>(n=2)</b> | <b>MVC<br/>(n=1)</b> |
|----------------------------------------|----------------------|----------------------|----------------------|----------------------|
| <b>Age (years)</b>                     | 55                   | 49                   | 50 (47, 53)          | 56                   |
| <b>Race</b>                            |                      |                      |                      |                      |
| <b>Caucasian</b>                       |                      |                      | 1                    |                      |
| <b>African-American</b>                | 1                    | 1                    | 1                    | 1                    |
| <b>Menopause Status</b>                |                      |                      |                      |                      |
| <b>Pre</b>                             | 1                    |                      | 1                    |                      |
| <b>Post</b>                            |                      | 1                    | 1                    | 1                    |
| <b>BMI (kg/m<sup>2</sup>)</b>          | 39.1                 | 44.8                 | 37.7 (35.6, 39.8)    | 26.7                 |
| <b>CD4 (cells/mm<sup>3</sup>)</b>      | 782                  | 753                  | 862 (651, 1074)      | 672                  |
| <b>Plasma HIV RNA</b>                  | ND                   | ND                   | ND                   | ND                   |
| <b>Time on Current Regimen (years)</b> | 7                    | 5                    | 9.5 (8, 11)          | 8                    |
| <b>Time Since Diagnosis (years)</b>    | 26                   | 6                    | 20.5 (17, 24)        | 18                   |

\*data shown are median and range

ND=not detected

**Table S2. Human plasma and tissue antiretroviral drug concentrations.**

|                        | Emtricitabine<br>n=5   |                       | Tenofovir<br>n=5         |                         | Efavirenz<br>n=1 |        | Raltegravir<br>n=1 |        | Maraviroc<br>n=1 |        | Atazanavir<br>n=2 |                            |
|------------------------|------------------------|-----------------------|--------------------------|-------------------------|------------------|--------|--------------------|--------|------------------|--------|-------------------|----------------------------|
| Plasma<br>(ng/mL)      | 114 (63, 612)          |                       | 77 (36, 236)             |                         | 1140             |        | 368                |        | 89               |        | 1552 (413, 2690)  |                            |
|                        | Ileum                  | Rectum                | Ileum                    | Rectum                  | Ileum            | Rectum | Ileum              | Rectum | Ileum            | Rectum | Ileum             | Rectum                     |
| Tissue<br>(ng/g)       | 1019<br>(389,<br>2762) | 600<br>(146,<br>1306) | 9802<br>(2655,<br>17281) | 1736<br>(1385,<br>3145) | 2476             | 3044   | 65645              | 84072  | 6246             | 2614   | 18860             | 15107<br>(13284,<br>16929) |
| Tissue:Plasma<br>Ratio | 7<br>(2, 12)           | 3<br>(1, 9)           | 87<br>(35,297<br>)       | 41<br>(6,52)            | 5                | 6      | 189                | 242    | 74               | 31     | 30<br>(6,55)      | 24<br>(5,43)               |

\*Data shown are median and range

**Table S3. Proportion of CD3<sup>+</sup> T cells exposed to at least one antiretroviral drug.**

| Drug       | Ileum       |                |                 |               | Rectum      |                |                 |               |
|------------|-------------|----------------|-----------------|---------------|-------------|----------------|-----------------|---------------|
|            | Mice        |                | All<br>Macaques | All<br>Humans | Mice        |                | All<br>Macaques | All<br>Humans |
|            | BLT         | hu-HSC-<br>Rag |                 |               | BLT         | hu-HSC-<br>Rag |                 |               |
| <b>TFV</b> | 0 (0-0.4)   | ND             | 0.1 (0-0.5)     | 0.2 (0-0.5)   | 0.3 (0-0.7) | 0.5 (0-0.8)    | 0.1 (0-0.4)     | 0.1 (0-0.2)   |
| <b>FTC</b> | 0 (0-0.1)   | ND             | 0 (0-0.4)       | 0 (0-0.7)     | ND          | ND             | 0.1 (0-0.2)     | 0.1 (0-0.8)   |
| <b>RAL</b> | 0 (0-0.8)   | ND             | 0.4 (0.2-0.8)   | 0.5           | 0 (0-0.8)   | 0 (0-0.6)      | 0.4 (0.2-0.7)   | 0.6           |
| <b>EFV</b> |             | ND             | 0.6 (0-0.9)     | 0.6           |             | 0 (0-0.3)      | 0.5 (0.3-0.8)   | 0.3           |
| <b>MVC</b> | 0.1 (0-0.8) | 0 (0-0.7)      | 0.5 (0.2-0.6)   | 0.6           | 0.3 (0-0.8) | 0 (0-0.8)      | 0.3 (0.2-0.6)   | 0.3           |
| <b>ATZ</b> | 0.1 (0-0.8) | 0 (0-0.8)      | 0.4 (0.2-0.5)   | 0.6           | 0.2 (0-0.7) | 0 (0-0.7)      | 0.2 (0-0.4)     | 0.6           |

\*data shown are median and range

ND=not enough detectable samples to make comparison

TFV= tenofovir, FTC=emtricitabine, RAL=raltegravir, EFV=efavirenz, MVC=maraviroc, ATZ=atazanavir

**Table S4. Dosing of animals.**

| Dosing Regimen             | MICE |     |            |     | MACAQUES        |     |                 |     |
|----------------------------|------|-----|------------|-----|-----------------|-----|-----------------|-----|
|                            | BLT  |     | hu-HSC-Rag |     | TFV/FTC/ATZ/MVC |     | TFV/FTC/EFV/RAL |     |
|                            | +    | -   | +          | -   | +               | -   | +               | -   |
| <b>EFV</b>                 |      |     | N=6        | N=6 |                 |     |                 |     |
| <b>ATZ</b>                 |      |     | N=6        | N=6 |                 |     |                 |     |
| <b>TFV/FTC/RAL/MVC</b>     |      |     | N=6        | N=6 |                 |     |                 |     |
| <b>TFV/FTC/RAL/MVC/ATZ</b> | N=7  | N=6 |            |     |                 |     |                 |     |
| <b>CONTROL</b>             | N=2  | N=2 | N=3        | N=2 |                 |     |                 |     |
| <b>TFV/FTC/ATZ/MVC</b>     |      |     |            |     | N=3             | N=3 | N=3             | N=3 |
| <b>TFV/FTC/EFV/RAL</b>     |      |     |            |     | N=3             | N=3 | N=3             | N=3 |

TFV= tenofovir, FTC=emtricitabine, RAL=raltegravir, EFV=efavirenz, MVC=maraviroc, ATZ=atazanavir
